# Supplementary material
Source: PubMed Central journal article supplement (PMC5844329)
Supplement: 1165FigureS2.pdf [file 1165FigureS2.pdf]

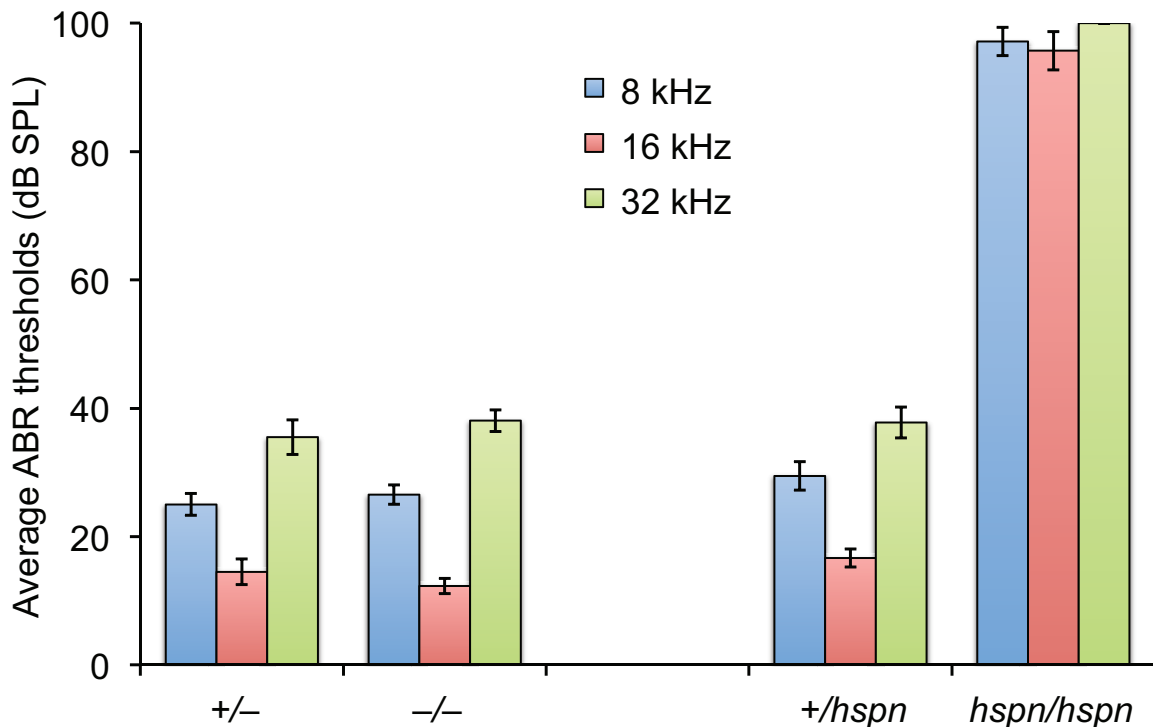

**Figure S2. Auditory phenotype of the *Slc25a13* targeted knockout mutation.**

Average 8, 16, and 32 kHz ABR thresholds of *Slc25a13*<sup>+/-</sup> heterozygous controls (5 females, 5 males) and *Slc25a13*<sup>-/-</sup> homozygous knockout mice (8 females, 5 males) compared with thresholds of *Slc25a13*<sup>+/hspn</sup> heterozygous controls (3 females, 6 males) and *Slc25a13*<sup>hspn/hspn</sup> homozygous hyperspin mice (4 females, 3 males). The *Slc25a13*<sup>-/-</sup> mice exhibited normal thresholds like heterozygous control mice, whereas the *Slc25a13*<sup>hspn/hspn</sup> mice exhibited greatly elevated thresholds indicating a profound hearing impairment. All mice were 5-6 weeks old when tested. Error bars represent standard errors of the means.
