# Supplementary material
Source: PubMed Central journal article supplement (PMC5844329)
Supplement: 1165TableS1.pdf [file 1165TableS1.pdf]

**Table S1. Mouse inbred strains with CRISPR/Cas9 generated deletions within the *Slc25a13* gene.**

The deletions were made to test for their potential enhancer effects on *Dlx5* activity and inner ear development and function.

| <b>Deletion name</b> | <b>Deletion size (bp)</b> | <b>GRCm38 Chromosome 6 coordinates of deletion (bp)</b> | <b>Strain name</b>                               | <b>JAX Stock #</b> |
|----------------------|---------------------------|---------------------------------------------------------|--------------------------------------------------|--------------------|
| hs1642               | 440                       | 6,163,224 - 6,163,663                                   | C57BL/6J- <i>Slc25a13</i> <sup>em8Mvw</sup> /Mvw | 29894              |
| hs2313 (eDlx#23)     | 455                       | 6,058,558 - 6,059,012                                   | C57BL/6J- <i>Slc25a13</i> <sup>em9Mvw</sup> /Mvw | 29895              |
| Line 6               | 25,428*                   | 6,141,226 - 6,166,653                                   | C57BL/6J- <i>Slc25a13</i> <sup>em4Mvw</sup> /Mvw | 30007              |
| Line 12              | 25,971                    | 6,141,223 - 6,167,193                                   | C57BL/6J- <i>Slc25a13</i> <sup>em5Mvw</sup> /Mvw | 30008              |
| Line 54              | 25,420*                   | 6,141,226 - 6,166,645                                   | C57BL/6J- <i>Slc25a13</i> <sup>em7Mvw</sup> /Mvw | 30010              |

\* The Line 6 deletion includes a 3 bp insertion, and the Line 54 deletion includes a 2 bp insertion.

The individual sequences for each target and the PCR primers used to identify the alleles are as follows (all shown 5'-3').

**hs1642** – sgRNA recognition regions: GATATGAATGTGAGATTT, GATGGGACACTTGTTTACAT; PCR and sequencing primers: TCTGTTTCCTCACTCAGCTTTAC, CTCTGTTTACCTGGGATGCTATG.

**hs2313** – sgRNA recognition regions: GATAAAGATGTCAGAGAC, GCCTGGCTGTGCATGGAA; PCR and sequencing primers: GATGCTGGCCATAGTATCCTTAC, TGCTCAAGTTCCATGGTATTACT.

**25 kb deletions (Lines 6, 12, and 54)** – sgRNA recognition regions: GCTGTGCGACACCTCTTT, GAGCAGGTCATTCGCCTA; PCR and sequencing primers: GGCCACGTGTAATGGTAAT, GGATAGGGTGCTATGTCTGTAATG.

Bridging oligonucleotide (used in the generation of Line 6 and 30008 only):

CTTAAGATGGACAAAAGATAAAAGGACAGTTTTCAAATGGGAAAAAATAGAACTAAGG  
AGACATTTTTCTAAAATAAAAATGGCCACAAGTACCTAACTAAGGTCTCAGAGGTTTT  
AAGAGACCTAGTAAAAGACAAATGCTGTGTCAGCCACCACTACTGTTCCCTTCCACTATGC  
AATGCTTTTCGTATGAGAAAG.
